# Supplementary material for: A frameshift in Yersinia pestis rcsD alters canonical Rcs signalling to preserve flea-mammal plague transmission cycles
Source: eLife. 2023 Apr 3;12:e83946. doi: 10.7554/eLife.83946 (PMC10191623; doi:10.7554/eLife.83946)
Supplement: Supplementary file 4. [file elife-83946-supp4.xlsx]

## Sheet: 26℃ WT vs ΔrcsB up
Gene ID	Putative function	Production	ΔrcsB 26°C		rcsDpe::rcsDpstb 26°C		ΔrcsB 37°C		rcsDpe::rcsDpstb 37°C
			Log FC	P value	Log FC	P value	Log FC	P value	Log FC	P value
YP_2062	tus	DNA replication terminus site-binding protein	3.94027	1.3668e-07	0.75568	0.27806	-6.66966	6.11e-07	0.108378	0.898592
YP_2160	rovA	virulence master transcriptional regulator RovA	2.28064	0.000868247	0.288929	0.659739	0.170925	0.79616	-0.268751	0.684393
YP_1942	YP_RS10110	hypothetical protein	2.98468	0.000994699	2.35178	0.00943598	-2.0024	0.430642	1.19343	0.390133
YP_1659	ybtS	yersiniabactin biosynthesis salicylate synthase YbtS	2.21378	0.00142661	-0.591286	0.395958	0.0351294	1	0.567257	0.450607
YP_1649	fyuA	siderophore yersiniabactin receptor FyuA	2.13938	0.00180954	-1.04264	0.121798	0.368418	0.578982	0.164574	0.808918
YP_1388	darC	darobactin export ABC transporter periplasmic adaptor subunit	2.61633	0.00191669	1.54188	0.0740011	2.37958	0.0536329	-0.715793	1
YP_1651	ybtT	yersiniabactin biosynthesis thioesterase YbtT	2.09114	0.00222334	-1.62437	0.0173754	-0.498626	0.518754	0.726921	0.335217
YP_1358	tssK	type VI secretion system baseplate subunit TssK	6.69507	0.00286389	6.84199	0.00199605	0.555959	0.63922	-0.762523	0.63315
YP_1654	irp2	yersiniabactin non-ribosomal peptide synthetase HMWP2	2.01424	0.00300746	-1.74074	0.0099817	0.463315	0.482729	1.04885	0.114343
YP_1988	YP_RS10340	Ail/Lom family outer membrane beta-barrel protein	2.06369	0.00343278	0.412845	0.571131	2.05933	0.282609	0.196029	1
YP_1386	darE	darobactin maturation radical SAM/SPASM protein DarE	2.00574	0.0038305	0.270024	0.697067	0.286789	0.735006	0.581212	0.43103
YP_1658	ybtX	yersiniabactin-associated zinc MFS transporter YbtX	1.98607	0.00469041	0.0280676	1	-1.0445	0.154124	0.172414	0.81677
YP_1653	irp1	yersiniabactin polyketide synthase HMWP1	1.90642	0.00480042	-1.5258	0.0226779	0.474804	0.473574	0.89104	0.182139
gene-YP_RS23660	YP_RS23660	DUF4113 domain-containing protein	6.47499	0.00614931	3.92744	0.52381	0.149992	1	-0.139892	1
YP_3847	treB	PTS trehalose transporter subunit IIBC	1.8092	0.00728596	0.0257428	0.969409	0.244816	0.710185	-0.699694	0.290962
YP_0971	YP_RS25060	hypothetical protein	2.02786	0.00755026	-0.697149	0.450687	-5.12548e-15	1	0	1
YP_3972	sodA	superoxide dismutase [Mn]	1.77393	0.00840346	-0.578008	0.37893	-0.0287424	0.966588	0.207245	0.753775
YP_1652	ybtU	yersiniabactin biosynthesis oxidoreductase YbtU	1.77532	0.00875508	-2.02658	0.00348458	-0.74921	0.392904	1.57397	0.0380209
YP_3193	tnpA	IS200/IS605-like element IS1541B family transposase	1.92846	0.00887558	0.775557	0.300655	-0.721166	0.327824	-0.975054	0.195724
gene-YP_RS05020	YP_RS05020	hypothetical protein	1.87155	0.00903423	-0.545341	0.491653	-0.132131	1	-4.54222	0.285714
YP_pMT039	YP_RS21810	hypothetical protein	2.91389	0.00977491	3.32142	0.00585897	1.6235	0.074136	0.860158	0.394643
YP_1650	ybtE	yersiniabactin biosynthesis salycil-AMP ligase YbtE	1.70397	0.0115897	-1.70608	0.0126289	0.343749	0.615927	1.28302	0.0633854
YP_1387	darD	darobactin export ABC transporter ATP-binding protein	1.66693	0.0209188	-0.64171	0.460565	1.69777	0.143889	1.40319	0.442579
YP_3690	YP_RS19260	DUF3757 domain-containing protein	2.66789	0.0222081	0.210113	1	-0.129542	1	-0.715793	1
YP_3940	YP_RS20505	SMI1/KNR4 family protein	1.63561	0.0230325	0.797282	0.263998	-0.0632265	1	0.292607	0.786774
gene-YP_RS04750	YP_RS04750	Hpt domain-containing protein	1.53038	0.0288596	0.964288	0.160793	-3.08313	0.000591025	0.652975	0.384798
YP_1588	flgH	flagellar basal body L-ring protein FlgH	1.72655	0.029826	0.685664	0.45842	-0.293835	0.783156	-0.313945	0.761112
YP_2098	tnpA	IS200/IS605-like element IS1541A family transposase	1.72582	0.0340197	0.506382	0.672306	0.955972	0.271828	-0.126176	1
gene-YP_RS10250	YP_RS10250	tRNA-Tyr	5.89812	0.0347826	4.48044	0.285714	0.267741	1	-1.27012	0.658385
YP_3105	thiS	sulfur carrier protein ThiS	5.89812	0.0347826	3.01927	1	-5.12548e-15	1	0	1
gene-YP_RS25330	YP_RS25330	gluconate 5-dehydrogenase	5.89812	0.0347826	4.87923	0.161491	-4.71156	0.285714	-0.346794	1
YP_0134	feoA	ferrous iron transporter A	1.41298	0.0361872	-0.63615	0.343023	0.568269	0.402862	0.257746	0.718288
YP_0345	YP_RS01790	cytochrome-c peroxidase	1.3783	0.0398777	0.582852	0.380284	0.565218	0.389232	-0.631181	0.33721
gene-YP_RS23500	YP_RS23500	DUF1240 domain-containing protein	1.84988	0.0399547	0.874791	0.366588	3.71186	0.0140787	4.19542	0.52381
YP_pCD59	YP_RS21280	hypothetical protein	3.05735	0.0399705	1.8481	0.430642	1.19193	0.11503	0.821186	0.299162
YP_3062	YP_RS15940	YjeO family protein	2.08898	0.0400936	2.19631	0.0236355	-0.660456	0.573302	-1.45376	0.187026
YP_3158	ilvC	ketol-acid reductoisomerase	1.34921	0.0424125	-0.634483	0.333542	0.200944	0.761675	-0.156808	0.814966
YP_1389	darB	darobactin export ABC transporter permease subunit	1.37528	0.0424337	0.397814	0.559225	1.47174	0.0727403	-1.65824	0.11546
YP_pMT040	YP_RS21815	hypothetical protein	1.68754	0.046668	-0.676662	0.612094	-0.696072	0.42351	-0.483295	0.600141
gene-YP_RS24300	YP_RS24300	hypothetical protein	2.0327	0.0480368	3.21673	0.000469533	0.503068	0.595081	1.96637	0.0152068
YP_2850	YP_RS14830	A24 family peptidase	2.0327	0.0480368	1.7513	0.0837197	-0.533337	1	1.77153	0.146765
YP_1573	fliQ	flagellar biosynthesis protein FliQ	2.109	0.0493358	1.82099	0.187026	-0.0304352	1	0.218384	0.898528
YP_2547	hmpA	NO-inducible flavohemoprotein	1.3468	0.0494391	0.391254	0.573468	0.196597	0.792468	-0.51576	0.472265

## Sheet: 26℃ WT vs ΔrcsBdown
Gene ID	Putative function	Production	ΔrcsB 26°C		rcsDpe::rcsDpstb 26°C		ΔrcsB 37°C		rcsDpe::rcsDpstb 37°C
			Log FC	P value	Log FC	P value	Log FC	P value	Log FC	P value
YP_0919	rcsB	transcriptional regulator RcsB	-8.28774	1.27997e-17	0.204819	0.755779	-9.24717	4.67037e-18	0.50938	0.439446
YP_3452	YP_RS18035	intradiol ring-cleavage dioxygenase	-4.10342	1.1191e-07	0.518443	0.435289	-0.226943	0.812063	1.26013	0.0870917
gene-YP_RS09420	YP_RS09420	YadA family autotransporter adhesin	-3.28362	4.20233e-06	0.415246	0.526068	-0.57771	0.402636	0.609591	0.366115
YP_0104	YP_RS00545	DUF4232 domain-containing protein	-3.20042	7.38353e-06	0.225812	0.730662	-0.575985	0.484925	0.614638	0.415664
YP_3671	YP_RS19165	DUF2169 domain-containing protein	-2.56806	0.000206656	-0.0953115	0.884113	0.226191	0.74254	0.298147	0.675706
YP_3666	tssK	type VI secretion system baseplate subunit TssK	-2.47588	0.000332323	0.199542	0.760366	-0.340075	0.629582	-0.283647	0.696788
YP_3670	YP_RS19160	pentapeptide repeat-containing protein	-2.4569	0.00036367	0.0049883	0.994001	-0.109209	0.88498	-0.28756	0.69523
YP_3677	YP_RS19195	Hcp family type VI secretion system effector	-2.44939	0.000375238	-0.144964	0.824444	0.362382	0.593658	0.423439	0.53938
YP_3675	tssF	type VI secretion system baseplate subunit TssF	-2.4332	0.000408378	0.0264055	0.967823	0.00273823	1	-0.0195517	0.986541
YP_3665	icmH	type IVB secretion system protein IcmH/DotU	-2.40679	0.000468039	0.467499	0.475414	-0.0914991	0.894994	-0.62811	0.357005
YP_3680	YP_RS19210	ImpA family type VI secretion system protein	-2.3959	0.000500093	0.160984	0.805842	0.837377	0.585507	2.28543	0.06403
YP_3672	vgrG	type VI secretion system tip protein VgrG	-2.37001	0.000557561	-0.182078	0.780604	-0.431705	0.526796	0.182743	0.792667
YP_3678	tssC	type VI secretion system contractile sheath large subunit	-2.3684	0.000561851	-0.420615	0.520489	0.16097	0.826312	0.422233	0.553863
gene-YP_RS25340	YP_RS25340	gluconate 5-dehydrogenase	-2.53876	0.000610941	0.748869	0.265598	-0.136214	0.89207	-3.22292	0.0279694
YP_2321	ompX	outer membrane protein OmpX	-2.35115	0.000640024	-0.226568	0.72974	-0.795139	0.228756	2.32554	0.000701995
YP_3673	tssH	type VI secretion system ATPase TssH	-2.33981	0.000647684	-0.0599067	0.927017	-0.0438104	0.950886	-0.104034	0.901486
YP_3668	YP_RS19150	DUF4150 domain-containing protein	-2.35268	0.000666822	-0.107158	0.871208	-1.83003	0.189984	-2.03975	0.137874
YP_3676	YP_RS19190	type VI secretion system baseplate subunit TssE	-2.32508	0.000702871	-0.323468	0.621305	0.0390463	1	0.449548	0.600141
YP_3679	tssB	type VI secretion system contractile sheath small subunit	-2.29437	0.000816789	-0.187666	0.774385	-0.369588	0.700163	0.480767	0.558636
YP_3674	tssG	type VI secretion system baseplate subunit TssG	-2.27369	0.000905754	0.249799	0.702848	-0.226943	0.812063	0.129776	0.951983
YP_3669	YP_RS19155	DUF3540 domain-containing protein	-2.2657	0.000929932	0.0599279	0.927052	0.165196	0.826762	-0.373137	0.624194
YP_0102	YP_RS00535	hypothetical protein	-2.26239	0.000976637	-0.157091	0.810891	0.122607	1	2.51075	0.0135382
YP_2670	YP_RS13870	ABC transporter ATP-binding protein	-2.33772	0.00105413	-0.754625	0.260833	0.07219	0.925419	-0.0459592	0.956163
YP_3939	YP_RS20500	SymE family type I addiction module toxin	-4.33669	0.00133434	-1.4281	0.14827	3.11037	1	4.7539	0.285714
YP_1814	YP_RS09430	hypothetical protein	-2.32266	0.00139783	0.627974	0.350871	-0.455305	0.619281	-0.510976	0.683327
YP_3667	tssJ	type VI secretion system lipoprotein TssJ	-2.17181	0.00151176	0.057987	0.930152	1.33745	0.146868	0.797226	0.426125
YP_3664	tssM	type VI secretion system membrane subunit TssM	-2.12019	0.00184443	0.332942	0.610925	0.0412021	0.951203	-0.0991724	0.881422
YP_3555	YP_RS18560	sugar ABC transporter ATP-binding protein	-2.21668	0.00196411	-0.458014	0.507346	0.318351	0.647028	-0.322576	0.665666
YP_3067	tssC	type VI secretion system contractile sheath large subunit	-2.09678	0.00208985	-0.0803048	0.902739	-0.307133	0.641071	-0.378716	0.565778
YP_3663	YP_RS19125	DUF6277 family protein	-2.05926	0.00243592	-0.243348	0.709923	0.208653	0.765997	-0.36924	0.591889
YP_3774	lsrG	(4S)-4-hydroxy-5-phosphonooxypentane-2%2C3-dione isomerase	-2.05793	0.00246713	-1.20884	0.0683902	0.0808955	0.90649	-0.933482	0.163403
YP_2519	YP_RS13065	hypothetical protein	-2.92302	0.00254733	0.815385	0.303974	0.847193	0.438083	5.09018	1.50929e-08
gene-YP_RS13875	YP_RS13875	iron ABC transporter permease	-2.04439	0.00283567	-0.945847	0.153638	0.249634	0.713804	0.27996	0.681994
YP_3773	lsrF	3-hydroxy-5-phosphonooxypentane-2%2C4-dione thiolase	-2.02097	0.0028896	-1.5661	0.0192024	0.0483494	0.942457	-0.841465	0.204643
YP_1581	YP_RS08260	ABC transporter permease	-2.16079	0.00293137	-0.621036	0.37356	-0.136948	0.94052	1.27252	0.0978397
YP_3066	tssE	type VI secretion system baseplate subunit TssE	-2.14449	0.00305814	-0.169268	0.808566	0.150151	0.842194	-0.777906	0.294153
YP_3772	lsrB	autoinducer 2 ABC transporter substrate-binding protein LsrB	-1.99928	0.00319071	-1.43276	0.0315974	0.169932	0.799061	-0.635415	0.337469
YP_1710	astB	N-succinylarginine dihydrolase	-1.97572	0.00376546	-0.820461	0.215234	-0.222285	0.738185	-6.49501	0.000350758
YP_3750	osmY	molecular chaperone OsmY	-1.94882	0.00399261	-0.829939	0.207351	-0.379179	0.565491	-5.08571	5.52814e-07
gene-YP_RS23255	proY	proline-specific permease ProY	-1.93435	0.00456644	-0.708167	0.284751	0.38092	0.571187	0.796499	0.238999
YP_3466	YP_RS18105	Hcp family type VI secretion system effector	-6.47662	0.00614931	-3.5119	0.0279694	-2.0024	0.430642	-4.94169	0.161491
YP_1461	YP_RS07605	polysaccharide deacetylase	-1.91012	0.00635076	-0.28528	0.673023	0.54812	0.42182	1.91356	0.00596313
YP_3771	lsrD	autoinducer 2 ABC transporter permease LsrD	-1.81772	0.00705384	-1.09578	0.0978298	0.151826	0.822258	-1.05434	0.122155
YP_3065	tssF	type VI secretion system baseplate subunit TssF	-1.89054	0.00755933	0.0294459	0.970449	0.354163	0.611435	-0.558386	0.442543
YP_1753	YP_RS09125	glycine zipper 2TM domain-containing protein	-1.80176	0.0078078	0.586508	0.372581	-0.692139	0.314837	4.31716	9.99316e-09
YP_3749	YP_RS19545	DUF1328 domain-containing protein	-1.8132	0.00801302	-0.910008	0.171769	0.211382	0.78198	3.40546	3.39556e-06
YP_1708	astA	arginine N-succinyltransferase	-1.83734	0.00861676	-0.609803	0.365466	-0.550646	0.415584	3.20085	7.56061e-06
YP_0360	YP_RS01865	L-ribulose-5-phosphate 4-epimerase	-2.02009	0.00862549	-0.519445	0.4866	0.780593	0.358608	2.4237	0.00152753
YP_1267	YP_RS06600	phosphatase PAP2 family protein	-1.75382	0.00938327	-0.118909	0.856661	-0.490264	0.459289	1.00348	0.131155
YP_1711	astE	succinylglutamate desuccinylase	-1.75715	0.00983738	-0.723913	0.276177	-0.108709	0.880346	2.28557	0.00097263
YP_3770	lsrC	autoinducer 2 ABC transporter permease LsrC	-1.73347	0.0100453	-1.29531	0.0515437	0.143481	0.836073	-0.73698	0.281137
YP_2328	glnP	glutamine ABC transporter permease GlnP	-1.76791	0.010085	0.0995615	0.885095	-0.509138	0.443195	1.76044	0.00923213
YP_3845	YP_RS20040	PliI family lysozyme inhibitor of I-type lysozyme	-1.70166	0.0112758	0.110379	0.865994	-0.0132563	0.989304	-0.0602641	0.932533
YP_3068	tssB	type VI secretion system contractile sheath small subunit	-1.72756	0.0126303	0.209756	0.759619	0.16427	0.812203	0.00792811	1
YP_2317	YP_RS12025	erythritol/L-threitol dehydrogenase	-1.70386	0.0140508	-0.811707	0.230424	0.390164	0.560899	0.514144	0.444633
gene-YP_RS13540	YP_RS13540	tRNA-Val	-6.15874	0.0140787	-1.33391	0.251568	-1.60119	0.658385	-0.346794	1
YP_3769	lsrA	autoinducer 2 ABC transporter ATP-binding protein LsrA	-1.60337	0.016614	-1.40456	0.0349012	0.040264	0.951981	-0.519866	0.430174
YP_3402	YP_RS17770	fimbrial protein	-1.66286	0.017043	0.303533	0.651845	-0.0968765	0.9053	0.436489	0.527337
YP_1355	YP_RS07070	ACP S-malonyltransferase	-2.1039	0.0171989	-0.362647	0.644988	0.123989	1	0.797226	0.426125
YP_3046	YP_RS15860	hypothetical protein	-1.69031	0.0176484	0.277907	0.684997	-0.30355	0.699347	-1.30774	0.10344
YP_2606	YP_RS13515	DUF2502 domain-containing protein	-1.7103	0.018283	0.110081	0.889805	0.0245703	1	3.68189	1.11533e-06
YP_3766	lsrK	autoinducer-2 kinase	-1.57794	0.0183325	-1.45351	0.0292405	-0.0272737	0.968356	-0.897455	0.176941
YP_1624	hpaB	4-hydroxyphenylacetate 3-monooxygenase%2C oxygenase component	-1.5818	0.0185431	0.0319412	0.961936	-0.136041	0.836978	0.376833	0.567371
YP_2327	glnH	glutamine ABC transporter substrate-binding protein GlnH	-1.54879	0.0218049	0.018883	0.979028	-0.222245	0.738825	2.11524	0.00196057
YP_1131	YP_RS05900	Gfo/Idh/MocA family oxidoreductase	-1.6096	0.0255211	-0.903544	0.201441	0.955972	0.271828	1.35889	0.115723
YP_3261	metE	5-methyltetrahydropteroyltriglutamate--homocysteine S-methyltransferase	-1.48658	0.0259727	-0.0601211	0.926881	-0.418997	0.533033	-0.44309	0.514167
gene-YP_RS24160	iolG	inositol 2-dehydrogenase	-1.50073	0.0263151	-0.874882	0.188537	-0.160848	0.814847	0.309878	0.640828
YP_0930	YP_RS04810	YfaZ family protein	-1.54629	0.0275472	0.395252	0.554835	-0.0786048	0.910218	0.968101	0.175134
YP_1709	astD	succinylglutamate-semialdehyde dehydrogenase	-1.46416	0.0291554	-0.535017	0.417074	-0.586284	0.375961	2.77486	7.25374e-05
YP_2672	YP_RS13880	ABC transporter substrate-binding protein	-1.45574	0.0295291	-0.790316	0.230783	0.251182	0.703957	0.0879334	0.897543
YP_2661	napA	nitrate reductase catalytic subunit NapA	-1.44914	0.0298571	0.0736976	0.910475	-0.25366	0.69935	0.069978	0.91567
YP_pMT114	YP_RS22135	type II toxin-antitoxin system Phd/YefM family antitoxin	-1.53805	0.0309575	0.0586092	0.94662	0.218767	0.76904	0.562604	0.430728
YP_0143	YP_RS00750	intracellular growth attenuator family protein	-1.44178	0.0310307	-0.112731	0.863933	-0.355297	0.592128	2.16728	0.00154048
YP_2663	napF	ferredoxin-type protein NapF	-1.4401	0.0317777	0.301277	0.646691	-0.314711	0.635979	0.651209	0.323947
YP_0445	YP_RS02305	methylenetetrahydrofolate reductase	-1.44321	0.0332894	0.48962	0.459138	1.00308	0.244669	0.729561	0.416921
YP_0677	YP_RS03510	amino acid ABC transporter permease	-1.96015	0.0335404	-1.29283	0.128197	-0.214187	0.84754	-0.438849	0.656347
YP_1582	YP_RS08265	bifunctional aldolase/short-chain dehydrogenase	-1.44872	0.0338675	-0.671207	0.315457	0.328157	0.645526	0.546772	0.424572
YP_1132	YP_RS05905	ABC transporter permease	-1.76935	0.0340197	-1.03811	0.193364	0.238267	1	0.0675889	1
YP_1626	hpaI	4-hydroxy-2-oxoheptanedioate aldolase	-1.40664	0.0350982	-0.160676	0.80663	-0.278292	0.671868	0.347422	0.596766
YP_2316	YP_RS12020	substrate-binding domain-containing protein	-1.45695	0.0368358	-0.266756	0.698452	1.10468	0.119073	0.861793	0.233902
gene-YP_RS25175	YP_RS25175	gluconate 5-dehydrogenase	-2.53333	0.0381992	0.853503	0.308509	0.983	0.352672	-1.98211	0.282609
YP_2660	napB	nitrate reductase cytochrome c-type subunit	-1.38753	0.0384534	0.106723	0.871865	-0.324297	0.630823	0.0414968	0.955913
YP_1628	YP_RS08500	5-carboxymethyl-2-hydroxymuconate Delta-isomerase	-1.38151	0.0384988	-0.311203	0.635522	0.0764866	0.908227	0.618708	0.3475
YP_1490	YP_RS07780	PAS domain S-box protein	-1.38731	0.0386384	0.252264	0.701988	0.0366543	0.959765	0.521603	0.433749
YP_1580	YP_RS08255	substrate-binding domain-containing protein	-1.3944	0.0389018	-0.963984	0.148858	0.222439	0.766568	0.778118	0.261179
YP_0356	YP_RS01845	ABC transporter permease	-1.53831	0.0391952	-0.956355	0.188534	0.0686653	0.971028	-0.833183	0.288382
YP_3060	YP_RS15930	DUF805 domain-containing protein	-3.26818	0.0399705	-1.90046	0.189984	-1.0435	1	-3.98789	0.52381
YP_3379	hutH	histidine ammonia-lyase	-1.3605	0.0408251	-1.02629	0.120093	0.341786	0.601993	0.546362	0.40515
YP_2944	YP_RS15325	RidA family protein	-1.39227	0.0416089	-0.683555	0.309003	0.492749	0.521876	0.429718	0.556146
YP_3937	YP_RS20490	helix-turn-helix domain-containing protein	-1.39112	0.0417367	0.220681	0.740554	-0.0331954	1	0.289986	0.735006
YP_1983	oppF	murein tripeptide/oligopeptide ABC transporter ATP binding protein OppF	-1.35589	0.0432179	-0.428014	0.515606	0.59632	0.372972	0.300108	0.654965
YP_pMT059	YP_RS21905	hypothetical protein	-2.31336	0.0456519	-0.279754	0.84052	-0.846902	0.769726	-0.0986969	1
gene-YP_RS25530	YP_RS25530	hypothetical protein	-1.7364	0.0459806	0.219964	0.821578	0.293746	0.752733	1.21497	0.119726
YP_2108	YP_RS10960	type II toxin-antitoxin system RelE/ParE family toxin	-1.82958	0.0480368	-0.431968	0.66464	0.843484	0.497906	1.19343	0.390133
YP_1122	YP_RS05850	LuxR family transcriptional regulator	-2.43457	0.0493358	1.46513	0.0727403	6.40933	0.00614931	8.11964	9.4751e-06
YP_1592	flgD	flagellar hook assembly protein FlgD	-2.43457	0.0493358	0.0757939	1	-2.67046	0.0182584	-1.60532	0.0967864

## Sheet: 26℃ WT vs rcsDpstb up
Gene ID	Putative function	Production	rcsDpe::rcsDpstb 26°C		ΔrcsB 26°C		ΔrcsB 37°C		rcsDpe::rcsDpstb 37°C
			Log FC	P value	Log FC	P value	Log FC	P value	Log FC	P value
YP_pMT029	YP_RS21760	hypothetical protein	3.21673	0.0293231	1.12115	0.442579	-0.687233	1	1.18469	0.585507
YP_3922	ssuD	FMNH2-dependent alkanesulfonate monooxygenase	6.84199	0.0300693	0.693407	0.291859	-0.165996	0.81843	0.102513	0.897008
YP_3772	lsrB	autoinducer 2 ABC transporter substrate-binding protein LsrB	3.6673	0.0315974	-1.99928	0.00319071	0.169932	0.799061	-0.635415	0.337469
YP_0335	YP_RS01740	erythritol/L-threitol dehydrogenase	3.32142	0.0319796	-0.224101	0.734712	0.377251	0.57291	0.207541	0.756638
YP_1536	wrbA	NAD(P)H:quinone oxidoreductase	2.35178	0.0329665	0.0349582	0.957387	0.0203756	0.975794	0.415409	0.526788
YP_2843	gspG	type II secretion system major pseudopilin GspG	2.89107	0.0347826	4.52285	0.285714	1.74658	0.430642	2.39325	0.282609
YP_3050	fliS	flagellar export chaperone FliS	2.17512	0.0347826	3.05824	1	1.05536	0.442579	-0.346794	1
YP_0203	tnpA	IS200/IS605-like element IS1541B family transposase	3.4065	0.0347826	0.724578	0.612094	-2.57339	0.186957	-1.3155	0.372947
YP_1056	tnpA	IS200/IS605-like element IS1541A family transposase	2.08026	0.0347826	-1.22757	0.442579	2.72353	0.084472	2.07944	0.430642
YP_1887	YP_RS09835	ShlB/FhaC/HecB family hemolysin secretion/activation protein	2.20034	0.0347826	-2.69218	0.186957	-3.23272	1	-3.07607	1
gene-YP_RS23085	YP_RS23085	hypothetical protein	2.19631	0.0347826	-1.78149	0.372947	-5.12548e-15	1	0	1
YP_3769	lsrA	autoinducer 2 ABC transporter ATP-binding protein LsrA	2.46783	0.0349012	-1.60337	0.016614	0.040264	0.951981	-0.519866	0.430174
YP_2460	cspA	RNA chaperone/antiterminator CspA	2.46783	0.0372648	0.186293	0.831501	-0.200648	0.870304	1.95745	0.00986264
YP_3957	YP_RS20590	type VI secretion system baseplate subunit TssF	5.85451	0.0384394	1.28389	0.119726	0.0512818	0.969519	0.0999261	0.900079
YP_1506	YP_RS07865	hypothetical protein	5.85451	0.0396963	-1.50247	0.146765	0.825432	0.726708	-3.98789	0.52381
YP_1302	YP_RS06780	fumarylacetoacetate hydrolase family protein	1.48663	0.0405115	-0.0453418	0.952286	0.103293	0.890488	0.527798	0.438006
YP_0878	tnpA	IS200/IS605-like element IS1541B family transposase	1.60647	0.0447917	-0.0414915	1	-0.922839	0.63315	-0.259473	1
gene-YP_RS07670	YP_RS07670	tRNA-Asn	1.88975	0.0456519	-2.2265	0.0572733	0.179287	1	-0.746268	0.726708

## Sheet: 26℃ WT vs rcsDpstb down
Gene ID	Putative function	Production	rcsDpe::rcsDpstb 26°C		ΔrcsB 26°C		ΔrcsB 37°C		rcsDpe::rcsDpstb 37°C
			Log FC	P value	Log FC	P value	Log FC	P value	Log FC	P value
gene-YP_RS24300	YP_RS24300	hypothetical protein	-2.02658	0.000469533	2.0327	0.0480368	0.503068	0.595081	1.96637	0.0152068
YP_1358	tssK	type VI secretion system baseplate subunit TssK	-3.99286	0.00199605	6.69507	0.00286389	0.555959	0.63922	-0.762523	0.63315
YP_1652	ybtU	yersiniabactin biosynthesis oxidoreductase YbtU	-2.2825	0.00348458	1.77532	0.00875508	-0.74921	0.392904	1.57397	0.0380209
YP_1254	YP_RS06525	prohibitin family protein	-1.74074	0.00547934	-2.0353	0.0910982	2.5342	0.12496	2.39325	0.282609
YP_3022	fliN	flagellar motor switch protein FliN	-2.57053	0.00547934	2.41534	0.186957	-0.134825	1	-1.3155	0.372947
YP_3946	YP_RS20535	ImpA family type VI secretion system protein	-1.70608	0.00571617	-0.525998	0.50907	-0.542829	0.840166	-0.448714	0.822492
YP_pMT039	YP_RS21810	hypothetical protein	-2.25119	0.00585897	2.91389	0.00977491	1.6235	0.074136	0.860158	0.394643
YP_1942	YP_RS10110	hypothetical protein	-2.53169	0.00943598	2.98468	0.000994699	-2.0024	0.430642	1.19343	0.390133
gene-YP_RS18175	YP_RS18175	site-specific integrase	-1.62437	0.00977491	1.68004	0.266667	4.57943	0.285714	5.1555	0.161491
YP_1654	irp2	yersiniabactin non-ribosomal peptide synthetase HMWP2	-2.41104	0.0099817	2.01424	0.00300746	0.463315	0.482729	1.04885	0.114343
gene-YP_RS04720	YP_RS04720	tRNA-Thr	-1.5661	0.0105702	0.192199	1	-0.135219	1	0.573978	0.580436
YP_3169	YP_RS16575	type 1 fimbrial protein	-3.64799	0.0114318	-1.17973	0.199929	-1.56612	0.23879	-0.235815	1
YP_1650	ybtE	yersiniabactin biosynthesis salycil-AMP ligase YbtE	-1.55229	0.0126289	1.70397	0.0115897	0.343749	0.615927	1.28302	0.0633854
YP_3148	ilvM	acetolactate synthase 2 small subunit	-1.72173	0.012692	-0.469032	0.592573	0.275417	0.84052	-0.224796	0.898528
YP_2589	YP_RS13430	DUF4225 domain-containing protein	-2.42564	0.0141459	0.675338	1	1.39507	0.372947	1.73902	0.372947
gene-YP_RS24700	YP_RS24700	hypothetical protein	-1.53389	0.0155279	1.36669	0.147866	-0.710402	0.700311	0.503646	0.63922
YP_2582	YP_RS13395	LuxR family transcriptional regulator	-1.5258	0.0167826	-2.0353	0.0910982	0.725568	0.479207	1.2023	0.228158
YP_1288	psaB	chaperone protein PsaB	-3.5119	0.0171989	0.600521	0.725047	-0.148597	0.820655	-0.724405	0.270934
YP_1651	ybtT	yersiniabactin biosynthesis thioesterase YbtT	-1.45351	0.0173754	2.09114	0.00222334	-0.498626	0.518754	0.726921	0.335217
YP_1377	tssJ	type VI secretion system lipoprotein TssJ	-1.45044	0.0182584	-1.52655	0.101169	-1.80475	0.11546	-0.306496	0.884696
YP_3773	lsrF	3-hydroxy-5-phosphonooxypentane-2%2C4-dione thiolase	-1.43276	0.0192024	-2.02097	0.0028896	0.0483494	0.942457	-0.841465	0.204643
YP_0822	YP_RS04230	glycosyltransferase family 4 protein	-1.44493	0.0197869	0.181023	0.898528	5.54894	0.0565217	5.46931	0.0942029
YP_0311	sodC	superoxide dismutase family protein	-1.4204	0.0202921	0.962929	0.144269	0.105589	0.873372	0.225078	0.732919
YP_3789	YP_RS19760	ATP-binding protein	-5.80457	0.0208791	0.024787	1	1.35617	0.129867	1.43273	0.0994744
YP_3249	YP_RS16990	hypothetical protein	-5.80457	0.0222081	-0.0577155	1	1.61305	0.266667	0.207536	1
YP_3921	ssuC	aliphatic sulfonate ABC transporter permease SsuC	-5.80457	0.0225958	-0.165514	0.802096	1.92018	0.0287327	1.74299	0.0459806
YP_1653	irp1	yersiniabactin polyketide synthase HMWP1	-5.80457	0.0226779	1.90642	0.00480042	0.474804	0.473574	0.89104	0.182139
YP_3062	YP_RS15940	YjeO family protein	-1.40456	0.0236355	2.08898	0.0400936	-0.660456	0.573302	-1.45376	0.187026
YP_3466	YP_RS18105	Hcp family type VI secretion system effector	-2.31116	0.0279694	-6.47662	0.00614931	-2.0024	0.430642	-4.94169	0.161491
YP_3766	lsrK	autoinducer-2 kinase	-1.41403	0.0292405	-1.57794	0.0183325	-0.0272737	0.968356	-0.897455	0.176941
YP_3054	YP_RS15900	FliA/WhiG family RNA polymerase sigma factor	-2.01206	0.0293231	0.931955	0.585507	0.221451	0.854437	-0.573283	0.63315

## Sheet: 37℃ WT vs ΔrcsB up
Gene ID	Putative function	Production	ΔrcsB 37°C		ΔrcsB 26°C		rcsDpe::rcsDpstb 26°C		rcsDpe::rcsDpstb 37°C
			Log FC	P value	Log FC	P value	Log FC	P value	Log FC	P value
YP_3862	YP_RS20125	LysR family transcriptional regulator	3.70081	0.00745943	-0.687217	0.374666	0.152886	0.866725	2.46724	0.00666491
YP_3448	iucC	IucA/IucC family siderophore biosynthesis protein	2.51945	0.0100416	-0.263621	0.756575	-0.188406	0.86039	-1.175	0.160738
YP_1984	YP_RS10325	hypothetical protein	3.37177	0.0102151	1.11664	0.270771	-0.0416961	1	2.65084	0.186957
gene-YP_RS24055	YP_RS24055	gluconate 5-dehydrogenase	6.53345	0.0140787	-0.156323	1	-0.156362	0.904233	5.94541	0.0347826
gene-YP_RS08230	YP_RS08230	type II toxin-antitoxin system HicA family toxin	3.79864	0.0140787	-0.521754	0.662736	0.218911	0.909315	0	1
YP_3656	YP_RS25335	hypothetical protein	6.40933	0.0140787	-2.12056	0.430642	-0.353224	0.769726	4.19542	0.52381
gene-YP_RS23500	YP_RS23500	DUF1240 domain-containing protein	3.71186	0.0140787	1.84988	0.0399547	0.874791	0.366588	4.19542	0.52381
YP_3393	YP_RS17725	ogr/Delta-like zinc finger family protein	3.71186	0.0141459	1.01641	0.521739	1.90111	0.137874	3.05906	0.0577711
YP_1350	YP_RS07045	enoyl-CoA hydratase/isomerase family protein	2.42423	0.0155141	-0.903727	0.394643	0.343259	0.814851	1.36107	0.305221
YP_1592	flgD	flagellar hook assembly protein FlgD	3.61954	0.0182584	-2.43457	0.0493358	0.0757939	1	-1.60532	0.0967864
gene-YP_RS24320	YP_RS24320	hypothetical protein	6.12359	0.0219002	-2.4345	0.282609	0.118735	1	0.384737	0.725047
gene-YP_RS25415	YP_RS25415	hypothetical protein	6.12359	0.023239	3.05824	1	0	1	1.5929	0.251568
YP_1492	istA	IS21-like element IS100 family transposase	6.12359	0.0279694	-2.00005	0.191276	-0.168759	1	0.196029	1
gene-YP_RS09745	YP_RS09745	tRNA-Ser	6.12359	0.0280835	-0.609524	0.459963	-0.468953	0.580886	-2.78693	0.00404697
YP_3921	ssuC	aliphatic sulfonate ABC transporter permease SsuC	3.52089	0.0287327	-0.165514	0.802096	-1.53389	0.0225958	1.74299	0.0459806
YP_2252	tnpA	IS200/IS605-like element IS1541A family transposase	2.41287	0.0293231	0.384659	0.686852	1.10782	0.17611	0.219042	0.925108
YP_pMT015	YP_RS21690	Ig domain-containing protein	2.4791	0.0297218	0.886561	0.497906	1.41868	0.283653	0.38755	0.7571
gene-YP_RS18170	YP_RS18170	DUF2345 domain-containing protein	3.17661	0.0297218	-2.08981	0.109379	-0.360132	0.884696	2.04673	0.109379
YP_1206	YP_RS06290	YadA-like family protein	1.92018	0.0347826	-1.52655	0.101169	-1.62485	0.101169	5.94541	0.0347826
YP_3461	tssB	type VI secretion system contractile sheath small subunit	2.40165	0.0347826	0.304766	1	0.920993	0.726708	5.1555	0.161491
YP_2783	arfB	aminoacyl-tRNA hydrolase	5.76692	0.0391552	0.44888	0.527664	0.23534	0.753114	2.32196	0.00247791
gene-YP_RS11745	YP_RS11745	antibiotic biosynthesis monooxygenase	5.76692	0.0396963	1.02252	0.173572	0.803853	0.272377	1.95752	0.266667
YP_3867	YP_RS20145	phage holin family protein	1.60838	0.0399705	0.170345	0.928218	-1.43576	0.14853	1.11936	1
YP_pMT028	YP_RS21755	hypothetical protein	2.59974	0.0474936	-1.25707	0.145296	-0.270011	0.756575	0.277503	0.716288
YP_1353	YP_RS07060	lipocalin-like domain-containing protein	3.0408	0.0480368	0.0118179	1	0.0558219	0.959679	0.434485	0.840166
gene-YP_RS17240	YP_RS17240	IS3 family transposase	1.84188	0.0490758	0.470765	0.547186	0.37157	0.648562	-1.5209	0.109695

## Sheet: 37℃ WT vs ΔrcsB down
Gene ID	Putative function	Production	ΔrcsB 37°C		ΔrcsB 26°C		rcsDpe::rcsDpstb 26°C		rcsDpe::rcsDpstb 37°C
			Log FC	P value	Log FC	P value	Log FC	P value	Log FC	P value
YP_0919	rcsB	transcriptional regulator RcsB	-9.24717	4.67e-18	-8.28774	1.28e-17	0.204819	0.755779	0.50938	0.439446
YP_2062	tus	DNA replication terminus site-binding protein	-6.66966	6.11e-07	3.94027	1.37e-07	0.75568	0.27806	0.108378	0.898592
gene-YP_RS04750	YP_RS04750	Hpt domain-containing protein	-3.08313	0.000591025	1.53038	0.0288596	0.964288	0.160793	0.652975	0.384798
gene-YP_RS11315	YP_RS11315	tRNA-Val	-2.16095	0.00281198	-2.08981	0.109379	0.564052	0.587191	0.207536	1
gene-YP_RS25320	YP_RS25320	gluconate 5-dehydrogenase	-2.67046	0.00416566	-0.0708571	1	-1.14404	0.333681	-0.768104	0.612094
YP_3008	YP_RS15670	hypothetical protein	-6.09177	0.00416566	0.781061	0.335401	0.349583	0.767877	6.58894	0.00416566
gene-YP_RS07935	YP_RS07935	Hcp family type VI secretion system effector	-1.78447	0.00472911	-1.74435	0.078524	-0.983144	0.343208	0.879758	0.263939
YP_3248	YP_RS16985	hypothetical protein	-2.34809	0.00547934	-1.46629	0.148066	-0.990474	0.335879	2.86934	0.12496
YP_1122	YP_RS05850	LuxR family transcriptional regulator	-2.50172	0.00614931	-2.43457	0.0493358	1.46513	0.0727403	8.11964	9.4751e-06
YP_0101	YP_RS00530	HlyD family secretion protein	-1.57546	0.00744743	-1.12595	0.131459	0.0924634	0.918577	2.07944	0.430642
gene-YP_RS21450	YP_RS21450	transposase	-1.87544	0.00744743	-2.12056	0.430642	-0.752013	0.769726	1.11936	1

## Sheet: 37℃ WT vs rcsDpstb up
Gene ID	Putative function	Production	rcsDpe::rcsDpstb 37°C		ΔrcsB 26°C		rcsDpe::rcsDpstb 26°C		ΔrcsB 37°C
			Log FC	P value	Log FC	P value	Log FC	P value	Log FC	P value
YP_0955	YP_RS04940	GlsB/YeaQ/YmgE family stress response membrane protein	4.49197	0.00984998	-0.140029	0.831252	-0.38161	0.561022	0.274917	0.696092
YP_2460	cspA	RNA chaperone/antiterminator CspA	4.31716	0.00986264	0.186293	0.831501	2.46783	0.0372648	-0.200648	0.870304
YP_pMT008	YP_RS21650	tail assembly protein	5.09018	0.0102151	-2.69218	0.186957	-2.7853	0.12496	-3.23272	1
YP_0544	rpsR	30S ribosomal protein S18	3.62774	0.0103227	-0.203866	0.767422	-0.417985	0.53966	-1.2224	0.0938964
YP_0212	rplV	50S ribosomal protein L22	3.62994	0.0113503	-0.348517	0.597604	-0.131911	0.842394	-0.279939	0.672459
YP_0454	YP_RS02350	tellurite resistance TerB family protein	3.59132	0.0113878	0.578093	0.382576	0.445006	0.50263	0.220547	0.747526
YP_0314	cysJ	NADPH-dependent assimilatory sulfite reductase flavoprotein subunit	3.68189	0.0119062	0.0603329	0.926562	-0.141644	0.82856	-0.0619068	0.924754
YP_0213	rpsC	30S ribosomal protein S3	3.36819	0.012092	-0.0342123	0.958847	0.203065	0.756844	-0.107671	0.870473
YP_0003	asnA	aspartate--ammonia ligase	3.40546	0.0125736	0.0214215	0.989985	-0.205543	0.763403	0.0429097	0.960954
YP_3281	fadA	acetyl-CoA C-acyltransferase FadA	3.20085	0.0126164	-0.888985	0.177188	-1.03093	0.118541	0.286053	0.662191
YP_0102	YP_RS00535	hypothetical protein	4.32485	0.0135382	-2.26239	0.000976637	-0.157091	0.810891	0.122607	1
YP_3222	glpA	anaerobic glycerol-3-phosphate dehydrogenase subunit A	8.11964	0.0135918	0.373991	0.571288	0.111374	0.867238	0.418831	0.523264
YP_3787	YP_RS19750	type VI secretion system baseplate subunit TssG	2.77486	0.0140787	-1.78149	0.372947	-1.32413	0.442579	-2.38513	0.0999758
gene-YP_RS23355	YP_RS23355	SDR family NAD(P)-dependent oxidoreductase	2.64275	0.0140787	0	1	3.92744	0.52381	4.9793	0.161491
YP_1289	psaA	fimbrial polyadhesin PsaA	2.63287	0.0146335	0.87168	0.209265	0.812058	0.247699	-0.189553	0.77184
YP_1024	YP_RS05305	PsiF family protein	7.51468	0.014751	0.280385	0.672576	-0.263857	0.693764	-0.26192	0.713207
gene-YP_RS24300	YP_RS24300	hypothetical protein	2.47779	0.0152068	2.0327	0.0480368	-2.02658	0.000469533	0.503068	0.595081
YP_0215	rpmC	50S ribosomal protein L29	2.43189	0.0155141	-0.00164275	1	0.161532	0.864681	0.501897	0.539497
YP_2634	YP_RS13685	EspK/GogB family type III secretion system effector	3.66458	0.015692	0.208186	0.752314	-0.0733844	0.912327	0.032259	0.971449
YP_0923	nrdA	ribonucleoside-diphosphate reductase subunit alpha	2.36127	0.0161166	-0.149329	0.819595	-0.656099	0.317823	-0.215375	0.742486
YP_2452	nrdI	class Ib ribonucleoside-diphosphate reductase assembly flavoprotein NrdI	2.32554	0.0162728	0.600521	0.725047	-1.87713	0.266667	0.529919	0.670342
YP_1836	YP_RS09550	SEL1-like repeat protein	2.31427	0.0162728	0.302534	0.741364	-0.362647	0.644988	1.16849	0.26675
YP_2279	fae	formaldehyde-activating enzyme	2.34373	0.0162728	-0.518024	0.527962	-1.17596	0.131019	1.06985	0.324544
YP_0898	YP_RS04630	phage tail tube protein	2.27446	0.0167826	-0.798355	0.227063	-0.528485	0.422507	0.296591	0.786774
YP_1489	YP_RS07775	hypothetical protein	2.28557	0.0167826	-0.31227	0.697454	-0.362699	0.654708	-0.136628	0.917982
YP_3224	glpC	anaerobic glycerol-3-phosphate dehydrogenase subunit C	7.0324	0.0170098	0.265329	0.688625	0.0309941	0.96366	0.320384	0.626329
YP_1290	YP_RS06720	PsaF/MyfF family fimbrial adhesin regulatory protein	2.35064	0.0175813	0.307842	0.649247	0.521937	0.446289	-0.762128	0.277377
YP_0543	priB	primosomal replication protein N	2.9526	0.0176724	0.102092	0.877555	-0.302623	0.646071	-0.343099	0.603342
YP_0803	rsmS	pleiotropic regulatory protein RsmS	2.4237	0.0185701	0.00488513	0.995396	0.0274323	0.967918	0.642832	0.331838
YP_2617	cysK	cysteine synthase A	2.16728	0.0189223	0.319641	0.625059	-0.21244	0.745215	-0.130373	0.841947
YP_0451	YP_RS02335	ATP-grasp domain-containing protein	2.11524	0.0189909	-0.0224558	0.97357	-0.773087	0.241465	0.272905	0.680611
YP_0926	eco	serine protease inhibitor ecotin	2.32196	0.0195391	0.0468742	0.945009	-0.57308	0.386047	0.0927217	0.896604
YP_0684	YP_RS03550	ShlB/FhaC/HecB family hemolysin secretion/activation protein	2.41164	0.0197869	-0.00163411	1	0.533018	0.542911	1.34671	0.658385
YP_2667	YP_RS13850	hypothetical protein	3.52679	0.0201164	-0.091122	0.903725	0.649848	0.361175	0.907279	0.301975
YP_2965	YP_RS15450	multifunctional CCA addition/repair protein	1.95534	0.020139	-0.452446	0.490823	-0.15436	0.814137	-0.111556	0.86578
YP_2694	tnpA	IS200/IS605-like element IS1541B family transposase	6.58894	0.0201657	1.16375	0.141868	1.30917	0.0909391	-0.487238	0.561338
YP_2157	YP_RS11205	MliC family protein	1.91723	0.0203652	-0.293975	0.662502	-0.173579	0.796161	0.179841	0.791141
YP_1741	YP_RS09065	L-cystine transporter	1.91356	0.0204514	-0.115372	0.860631	0.185879	0.776895	-0.0950427	0.885784
YP_3263	udp	uridine phosphorylase	2.46724	0.0217906	-0.0636525	0.922398	-0.276207	0.672702	-0.904137	0.169916
YP_0461	YP_RS02385	hypothetical protein	1.80022	0.0219002	1.0794	0.25882	0.270238	0.884696	-1.67991	0.251568
YP_3532	YP_RS18445	PTS system mannose/fructose/sorbose family transporter subunit IID	6.30276	0.023006	-0.356521	0.589165	-0.427701	0.517111	-0.13572	0.838353
YP_3512	metK	methionine adenosyltransferase	1.76044	0.023689	-0.368022	0.574201	0.495886	0.449292	0.0655298	0.921597
YP_2518	rseC	SoxR-reducing system protein RseC	1.77048	0.0239681	-0.183547	0.797345	-0.218904	0.757133	0.109964	0.875449
YP_1923	YP_RS10015	YcgL domain-containing protein	1.95745	0.0240613	-0.0902438	0.896841	0.305771	0.647957	0.277247	0.685367
YP_1546	tcyL	cystine ABC transporter permease	3.75158	0.0253192	0.304685	0.645543	0.225429	0.733813	-0.307024	0.648638
YP_0542	rpsF	30S ribosomal protein S6	1.71132	0.0254929	0.251782	0.700671	-0.0168031	0.979824	-0.186779	0.776023
YP_2450	nrdF	class 1b ribonucleoside-diphosphate reductase subunit beta	1.67352	0.0261347	0.252203	0.738787	-0.0822499	0.942563	0.818425	0.277818
YP_3087	aceA	isocitrate lyase	2.51075	0.027086	0.332497	0.612497	-1.21433	0.0678478	0.127717	0.845276
YP_0549	YP_RS02835	DUF3757 domain-containing protein	6.13512	0.0276127	-0.376258	0.575931	-0.604275	0.370948	0.932491	0.190647
YP_3698	carA	glutamine-hydrolyzing carbamoyl-phosphate synthase small subunit	1.67595	0.0276199	0.855491	0.19595	-0.357246	0.590036	-0.638246	0.336721
YP_pMT009	YP_RS21655	C40 family peptidase	1.96637	0.0279694	1.01641	0.521739	-0.342891	1	-0.122351	1
YP_3019	YP_RS15725	flagellar biosynthetic protein FliR	1.61195	0.0279694	-2.18981	0.137874	-0.547716	0.700311	-0.90274	0.431875
gene-YP_RS25340	YP_RS25340	gluconate 5-dehydrogenase	2.45213	0.0279694	-2.53876	0.000610941	0.748869	0.265598	-0.136214	0.89207
YP_3868	YP_RS20150	M15 family metallopeptidase	2.19541	0.0287437	-0.330835	0.676549	-1.17526	0.131354	1.10712	0.352672
YP_4009	yidC	membrane protein insertase YidC	2.19541	0.0291678	0.218602	0.739331	-0.0385489	0.95385	-0.348826	0.595751
YP_2346	YP_RS12170	MFS transporter	1.58381	0.0297218	-0.482419	0.701513	0.525448	0.579401	1.69777	0.143889
YP_0182	tauB	taurine ABC transporter ATP-binding subunit	1.58734	0.0304585	-0.373861	0.568653	-0.486375	0.458645	-0.289453	0.673611
YP_0628	phnF	phosphonate metabolism transcriptional regulator PhnF	3.51288	0.0308098	-0.264048	0.725938	0.410341	0.568243	0.698735	0.326475
YP_1725	YP_RS08985	spore coat U domain-containing protein	1.92651	0.0316009	-1.24328	0.0658577	0.037969	0.955613	-0.513642	0.482914
YP_1228	cspD	cold shock-like protein CspD	1.55592	0.0317695	-0.866899	0.18816	-0.222272	0.734143	0.2542	0.69921
YP_0181	tauA	taurine ABC transporter substrate-binding protein	1.57006	0.0321122	-0.147223	0.822154	-0.458055	0.484723	-0.434116	0.516438
YP_3848	treC	alpha%2Calpha-phosphotrehalase	1.52782	0.0324529	0.848498	0.197573	-0.0751843	0.908792	0.174608	0.79001
YP_3381	YP_RS17660	PLP-dependent cysteine synthase family protein	1.53715	0.0334902	-0.0839201	0.902245	-0.0877986	0.896066	1.38161	0.0565489
YP_2112	YP_RS10980	mannitol dehydrogenase family protein	1.62661	0.0336198	-0.597296	0.368894	-0.321587	0.63062	0.173868	0.795907
gene-YP_RS24055	YP_RS24055	gluconate 5-dehydrogenase	1.47446	0.0347826	-0.156323	1	-0.156362	0.904233	6.12359	0.0140787
YP_1206	YP_RS06290	YadA-like family protein	1.56893	0.0347826	-1.52655	0.101169	-1.62485	0.101169	5.76692	0.0347826
YP_3023	YP_RS15745	FliM/FliN family flagellar motor switch protein	3.37687	0.0347826	2.19753	0.186957	2.67844	0.0844721	3.11037	1
gene-YP_RS25455	YP_RS25455	iron chelate uptake ABC transporter family permease subunit	2.26048	0.0347826	0	1	3.92744	0.52381	-1.32271	0.442579
YP_3314	YP_RS17340	hypothetical protein	2.5826	0.0347826	4.52285	0.285714	5.66543	0.0565217	-2.79177	0.12496
YP_1732	YP_RS09020	type 1 fimbrial protein	1.51649	0.0353346	0.0955794	0.901097	0.271469	0.716257	1.31667	0.0883561
YP_pPCP05	YP_RS22225	pesticin immunity protein	1.49035	0.0358451	-0.142828	0.846267	0.757138	0.265717	0.598901	0.381382
gene-YP_RS24480	YP_RS24480	gluconate 5-dehydrogenase	1.43381	0.0365433	0.938694	0.166773	0.834593	0.218961	0.67318	0.358656
YP_3614	YP_RS18870	oxidative stress defense protein	1.42458	0.0374617	-0.21727	0.74018	-0.481151	0.463231	0.00679239	0.992582
YP_1652	ybtU	yersiniabactin biosynthesis oxidoreductase YbtU	5.94541	0.0380209	1.77532	0.00875508	-2.2825	0.00348458	-0.74921	0.392904
YP_1775	YP_RS09230	SDR family oxidoreductase	5.94541	0.0384757	0.820522	0.213439	0.161607	0.806074	-0.112884	0.863555
YP_0516	YP_RS02655	hypothetical protein	5.94541	0.0391552	1.06533	0.16931	0.200576	0.801477	1.23135	0.113334
YP_4016	YP_RS20900	amino acid ABC transporter permease	1.61994	0.0393479	-0.130648	0.842268	-0.451789	0.491229	-0.116009	0.866042
gene-YP_RS24755	YP_RS24755	tRNA-Sec	1.43738	0.0396963	-1.22757	0.442579	0.502557	0.725047	0.42556	1
gene-YP_RS09440	YP_RS09440	alanine racemase	1.38692	0.0397471	0.288979	0.723265	0.0949156	0.916668	0.967582	0.235741
gene-YP_RS25205	YP_RS25205	gluconate 5-dehydrogenase	1.57397	0.0399547	-1.57038	0.0880012	-0.773634	0.371253	0.442799	0.792443
YP_0184	tauD	taurine dioxygenase	1.3783	0.0412149	-0.308061	0.637693	-0.684852	0.296862	0.187145	0.77774
YP_3441	YP_RS17975	hypothetical protein	1.58806	0.0422441	-0.427507	0.547616	0.309207	0.661954	0.154193	0.850972
YP_2226	YP_RS11550	transglycosylase SLT domain-containing protein	2.72534	0.0424135	-0.0695664	0.919402	0.478795	0.469359	0.238279	0.724691
YP_3747	YP_RS19535	metal-dependent hydrolase	1.58048	0.0424474	-0.784546	0.237559	-0.783713	0.238047	-0.0764756	0.919098
YP_3921	ssuC	aliphatic sulfonate ABC transporter permease SsuC	1.79171	0.0459806	-0.165514	0.802096	-5.80457	0.0225958	1.92018	0.0287327
YP_0233	rplQ	50S ribosomal protein L17	1.44875	0.0462408	0.0327527	0.960636	-0.00663786	0.992433	-0.134993	0.837851
YP_0924	nrdB	ribonucleotide-diphosphate reductase subunit beta	1.36649	0.0464903	0.230372	0.725874	-0.731727	0.26716	0.197005	0.767307
YP_2184	istA	IS21-like element IS100 family transposase	1.37745	0.0476604	0.150057	0.843897	0.580383	0.411382	0.523881	0.511706
YP_2296	YP_RS11920	ABC transporter substrate-binding protein	1.74299	0.0476925	-0.923773	0.244179	0.474171	0.528055	0.235805	0.801477
YP_0095	YP_RS00500	aquaporin family protein	1.32896	0.0482299	0.952096	0.15306	-0.649737	0.332147	0.560594	0.401877
YP_0688	fadE	acyl-CoA dehydrogenase FadE	1.43947	0.0484694	0.116434	0.858659	-1.09267	0.0983571	0.126378	0.846773
YP_0214	rplP	50S ribosomal protein L16	1.50534	0.0488137	-0.0863217	0.895945	0.0938403	0.886802	0.186584	0.778112
YP_3719	YP_RS23395	hypothetical protein	1.31069	0.0490758	1.50537	0.0727403	1.37612	0.0882712	1.38117	0.147385
YP_2202	YP_RS22975	hypothetical protein	1.73598	0.0493358	-0.259294	0.822492	-0.139146	1	1.41203	0.251568
gene-YP_RS25380	YP_RS25380	IS3 family transposase	2.39143	0.0493358	1.62852	0.430642	-3.34322	1	-0.67182	0.454082
YP_2516	rseA	anti-sigma-E factor RseA	1.30515	0.0493806	0.0271766	0.966988	-0.143609	0.826273	0.103097	0.874711
gene-YP_RS25325	YP_RS25325	hypothetical protein	1.62679	0.0497416	0.519319	0.638759	0.420672	0.732196	0.412067	0.700163

## Sheet: 37℃ WT vs rcsDpstb down
Gene ID	Putative function	Production	rcsDpe::rcsDpstb 37°C		ΔrcsB 26°C		rcsDpe::rcsDpstb 26°C		ΔrcsB 37°C
			Log FC	P value	Log FC	P value	Log FC	P value	Log FC	P value
YP_0937	adiC	arginine/agmatine antiporter	-4.96149	7.14455e-10	0.0623415	0.924162	-0.208279	0.750229	0.259638	0.693705
YP_1207	ansB	L-asparaginase 2	-3.53125	6.06187e-09	0.197724	0.820717	0.379555	0.617763	0.795181	0.269712
YP_1753	YP_RS09125	glycine zipper 2TM domain-containing protein	-3.31005	9.99316e-09	-1.80176	0.0078078	0.586508	0.372581	-0.692139	0.314837
YP_2519	YP_RS13065	hypothetical protein	-3.74906	1.50929e-08	-2.92302	0.00254733	0.815385	0.303974	0.847193	0.438083
YP_3750	osmY	molecular chaperone OsmY	-5.08571	5.52814e-07	-1.94882	0.00399261	-0.829939	0.207351	-0.379179	0.565491
YP_1707	YP_RS08895	aspartate aminotransferase family protein	-2.9859	6.11984e-07	-1.31836	0.0508862	-0.978873	0.143797	-0.246953	0.717868
gene-YP_RS24885	YP_RS24885	hypothetical protein	-2.98106	6.7481e-07	-0.227709	0.733976	0.454741	0.494854	-0.0354445	0.956937
YP_2606	YP_RS13515	DUF2502 domain-containing protein	-2.67863	1.11533e-06	-1.7103	0.018283	0.110081	0.889805	0.0245703	1
YP_3074	malK	maltose/maltodextrin ABC transporter ATP-binding protein MalK	-2.59388	1.42722e-06	-0.249399	0.702894	-0.184898	0.777298	0.0815076	0.90228
YP_3775	YP_RS19685	DUF2501 domain-containing protein	-2.57592	2.86435e-06	-0.397946	0.544166	-0.775246	0.239201	0.219611	0.744241
YP_3749	YP_RS19545	DUF1328 domain-containing protein	-2.58321	3.39556e-06	-1.8132	0.00801302	-0.910008	0.171769	0.211382	0.78198
YP_3073	YP_RS15990	maltoporin	-2.47841	4.23462e-06	-0.281596	0.666721	0.00191737	0.997674	0.217885	0.739882
YP_1708	astA	arginine N-succinyltransferase	-2.47569	7.56061e-06	-1.83734	0.00861676	-0.609803	0.365466	-0.550646	0.415584
gene-YP_RS22760	YP_RS22760	integrase core domain-containing protein	-2.42696	8.02481e-06	-0.58118	0.619281	-0.679789	0.454082	0.179287	1
YP_1122	YP_RS05850	LuxR family transcriptional regulator	-2.2849	9.4751e-06	-2.43457	0.0493358	1.46513	0.0727403	-2.50172	0.00614931
gene-YP_RS16000	YP_RS16000	hypothetical protein	-2.27093	1.08733e-05	0.387367	0.555883	0.0492202	0.941293	-0.14889	0.840101
YP_0818	YP_RS04210	NAD-dependent epimerase/dehydratase	-2.27502	1.89214e-05	0.499895	0.493202	-0.547172	0.473914	-0.839094	0.295755
YP_0208	rplD	50S ribosomal protein L4	-4.2149	2.63927e-05	-0.0672786	0.918919	0.27438	0.675931	-0.218747	0.739488
YP_0206	rpsJ	30S ribosomal protein S10	-2.24754	2.6974e-05	-0.128058	0.845378	0.24269	0.711243	-0.0567355	0.93184
YP_1709	astD	succinylglutamate-semialdehyde dehydrogenase	-2.07375	7.25374e-05	-1.46416	0.0291554	-0.535017	0.417074	-0.586284	0.375961
YP_4018	YP_RS20910	ABC transporter substrate-binding protein	-2.19351	0.000128447	0.751134	0.253011	-0.426615	0.514735	-0.058787	0.929203
YP_2384	yfcE	phosphodiesterase	-2.00085	0.000149165	-1.25187	0.060583	-0.489779	0.456985	-0.221058	0.73879
YP_3748	YP_RS19540	patatin family protein	-2.00893	0.000157326	-1.25643	0.0586247	-0.674731	0.3047	0.175676	0.79188
gene-YP_RS22970	rprA	antisense sRNA RprA	-2.78693	0.000164799	-4.77697	0.285714	1.02436	0.442579	-5.12548e-15	1
YP_0207	rplC	50S ribosomal protein L3	-1.94129	0.000194684	-0.191133	0.770598	0.34067	0.603117	-0.052606	0.93655
YP_2639	YP_RS13710	sulfate ABC transporter substrate-binding protein	-1.88216	0.000207562	0.00298308	0.996493	-0.246171	0.706721	-0.0670325	0.918768
YP_3639	YP_RS18990	L-alanine exporter AlaE	-6.49501	0.000214673	0.721791	0.272358	0.463971	0.479299	0.529473	0.420512
YP_1710	astB	N-succinylarginine dihydrolase	-6.49501	0.000350758	-1.97572	0.00376546	-0.820461	0.215234	-0.222285	0.738185
YP_4017	YP_RS20905	amino acid ABC transporter permease	-1.86819	0.000452577	0.0977596	0.881875	-0.368707	0.574333	-0.120058	0.858157
YP_0216	rpsQ	30S ribosomal protein S17	-2.05362	0.000476657	0.0188152	0.978986	0.114127	0.863715	-0.354213	0.5932
YP_2383	yfcD	NUDIX hydrolase YfcD	-1.8801	0.000537643	-0.782647	0.244228	-0.206981	0.755524	0.0240949	0.986437
YP_3072	malM	maltose operon protein MalM	-1.95557	0.000564844	0.157412	0.809831	0.279024	0.669758	0.29711	0.653646
YP_2992	YP_RS15580	hypothetical protein	-1.87211	0.000571838	1.163	0.285115	1.06466	0.285115	1.93617	0.109379
YP_3086	aceK	bifunctional isocitrate dehydrogenase kinase/phosphatase	-2.55273	0.000586557	-0.219709	0.739706	-0.638672	0.335717	0.00903911	0.989665
YP_2321	ompX	outer membrane protein OmpX	-6.37094	0.000701995	-2.35115	0.000640024	-0.226568	0.72974	-0.795139	0.228756
YP_2028	osmB	osmotically-inducible lipoprotein OsmB	-1.8159	0.000758344	-0.0213454	0.974335	0.0282906	0.965861	-0.511082	0.440302
YP_3986	YP_RS20745	OmpA family lipoprotein	-1.74702	0.000857768	-1.0715	0.113322	0.330847	0.618094	-0.248365	0.729874
YP_0075	cpxP	cell-envelope stress modulator CpxP	-1.76355	0.000862067	0.0704175	0.916383	-0.349789	0.600451	0.152246	0.816197
gene-YP_RS03790	ggt	gamma-glutamyltransferase	-2.01204	0.000920715	-0.522207	0.435778	-0.00247766	1	-0.351153	0.595629
YP_2149	YP_RS11165	CMD domain-containing protein	-1.73836	0.000940961	-0.101144	0.877101	0.00325363	0.996117	-0.020612	0.975311
YP_1711	astE	succinylglutamate desuccinylase	-1.7683	0.00097263	-1.75715	0.00983738	-0.723913	0.276177	-0.108709	0.880346
YP_1325	tnpA	IS200/IS605-like element IS1541B family transposase	-1.68932	0.00100641	0.135271	0.893954	-0.682311	0.467814	4.57943	0.285714
YP_0209	rplW	50S ribosomal protein L23	-1.69438	0.00101326	-0.222846	0.734683	0.0237721	0.97188	-0.0180485	0.979525
YP_3382	YP_RS17665	adenine phosphoribosyltransferase	-1.66194	0.00102803	-0.0788651	0.915039	0.561988	0.41043	0.320375	0.734719
YP_1480	YP_RS07720	membrane protein	-6.23518	0.00108208	-0.720496	0.307375	0.95041	0.164754	-1.01325	0.168059
YP_2668	YP_RS13855	metal-dependent hydrolase	-1.63563	0.00138806	-0.450954	0.533441	0.0844347	0.922974	1.22139	0.283653
YP_0394	rplS	50S ribosomal protein L19	-2.39006	0.00142805	0.701344	0.292238	0.296096	0.656683	-0.225883	0.737062
YP_0360	YP_RS01865	L-ribulose-5-phosphate 4-epimerase	-1.77531	0.00152753	-2.02009	0.00862549	-0.519445	0.4866	0.780593	0.358608
YP_0143	YP_RS00750	intracellular growth attenuator family protein	-2.79738	0.00154048	-1.44178	0.0310307	-0.112731	0.863933	-0.355297	0.592128
YP_2327	glnH	glutamine ABC transporter substrate-binding protein GlnH	-2.79738	0.00196057	-1.54879	0.0218049	0.018883	0.979028	-0.222245	0.738825
YP_0210	rplB	50S ribosomal protein L2	-1.61245	0.00238361	-0.42583	0.516027	0.016898	0.979706	-0.147075	0.822856
YP_2783	arfB	aminoacyl-tRNA hydrolase	-1.70846	0.00247791	0.44888	0.527664	0.23534	0.753114	5.76692	0.0391552
YP_1790	YP_RS09300	MgtC family protein	-1.60989	0.00249009	0.071445	0.935377	0.0960871	0.896882	0.486809	0.473419
YP_2453	YP_RS12720	redoxin NrdH	-1.56983	0.00277904	1.00152	0.232558	-0.769943	0.465039	-0.23514	0.814851
YP_1276	YP_RS06650	isopenicillin N synthase family oxygenase	-1.59527	0.00326992	-0.607096	0.354664	-0.465239	0.477484	-0.438327	0.504254
YP_3223	glpB	glycerol-3-phosphate dehydrogenase subunit GlpB	-2.16325	0.00333883	0.211571	0.752357	-0.0162741	0.982997	0.331702	0.614225
YP_1380	YP_RS07200	hypothetical protein	-1.55886	0.00356754	-2.91074	0.0844721	0.726449	0.545915	0.42556	1
YP_3282	fadB	fatty acid oxidation complex subunit alpha FadB	-1.53289	0.00385905	-0.333824	0.610088	-0.700829	0.286058	0.262708	0.688098
gene-YP_RS09745	YP_RS09745	tRNA-Ser	-6.0853	0.00404697	-0.609524	0.459963	-0.468953	0.580886	6.12359	0.0280835
YP_3008	YP_RS15670	hypothetical protein	-1.54079	0.00416566	0.781061	0.335401	0.349583	0.767877	-6.09177	0.00416566
YP_0453	YP_RS02345	TerD family protein	-1.52229	0.00423447	0.181665	0.781716	-0.243202	0.710682	0.15332	0.815322
YP_2966	YP_RS15455	SH3 domain-containing protein	-1.53309	0.00483062	-0.170975	0.796428	0.0366073	0.957538	-0.23166	0.730728
YP_0936	YP_RS04840	arginine decarboxylase	-1.49582	0.00555098	0.213841	0.743603	-0.568672	0.385662	0.350578	0.593192
YP_1461	YP_RS07605	polysaccharide deacetylase	-1.4945	0.00596313	-1.91012	0.00635076	-0.28528	0.673023	0.54812	0.42182
YP_1408	YP_RS07345	hypothetical protein	-3.22292	0.00614931	-0.596206	0.474911	0.134883	0.910267	1.02503	0.261464
YP_3956	tssG	type VI secretion system baseplate subunit TssG	-3.22292	0.00614931	0.36865	0.779001	0.164426	1	-0.90274	0.431875
YP_3076	malE	maltose/maltodextrin ABC transporter substrate-binding protein MalE	-1.4619	0.00615418	0.432404	0.508921	0.324736	0.619589	0.198256	0.763993
YP_3862	YP_RS20125	LysR family transcriptional regulator	-1.51477	0.00666491	-0.687217	0.374666	0.152886	0.866725	3.70081	0.00745943
YP_3924	ssuE	NADPH-dependent FMN reductase	-1.4594	0.00710814	0.0343588	0.959528	-0.440648	0.503738	-0.239897	0.749515
YP_3088	aceB	malate synthase A	-1.42852	0.00752087	0.339122	0.607386	-1.00356	0.131526	0.11025	0.866423
YP_0449	YP_RS02325	hypothetical protein	-1.88157	0.00768068	-0.266178	0.686956	0.228881	0.728821	0.460285	0.49184
YP_0183	tauC	taurine ABC transporter permease TauC	-5.72879	0.00785863	-0.314358	0.631753	-0.526269	0.422931	0.108638	0.881446
YP_3531	YP_RS18440	PTS mannose/fructose/sorbose/N-acetylgalactosamine transporter subunit IIC	-5.72879	0.00813386	-0.428184	0.529979	-0.397563	0.55862	-0.190004	0.786476
YP_1410	tnpA	IS200/IS605-like element IS1541B family transposase	-1.80331	0.00847458	0.887083	0.282111	1.13821	0.178488	-0.0866264	1
gene-YP_RS05395	cydX	cytochrome bd-I oxidase subunit CydX	-1.40411	0.00922396	1.79392	0.119582	0.938988	0.542974	-1.56612	0.23879
YP_1450	YP_RS24830	hypothetical protein	-1.3806	0.00922396	-1.15985	1	0.608903	0.726708	4.57943	0.285714
YP_2328	glnP	glutamine ABC transporter permease GlnP	-1.33393	0.00923213	-1.76791	0.010085	0.0995615	0.885095	-0.509138	0.443195
YP_2380	YP_RS12345	PTS sugar transporter subunit IIA	-1.35913	0.00927046	0.812613	0.218334	-0.968884	0.144862	-0.0734726	0.917534
YP_0452	YP_RS02340	tellurium resistance TerZ family protein	-1.32502	0.0096232	0.340257	0.60364	-0.281473	0.667641	0.495338	0.45037
YP_0450	YP_RS02330	phosphoribosyltransferase domain-containing protein	-2.15215	0.00979045	-0.353194	0.590495	-0.056529	0.931734	0.366631	0.579184
